# Supplementary material
Source: PubMed Central journal article supplement (PMC5633077)
Supplement: NIHMS73849-supplement-Supplementary_Figures.pdf [file NIHMS73849-supplement-Supplementary_Figures.pdf]

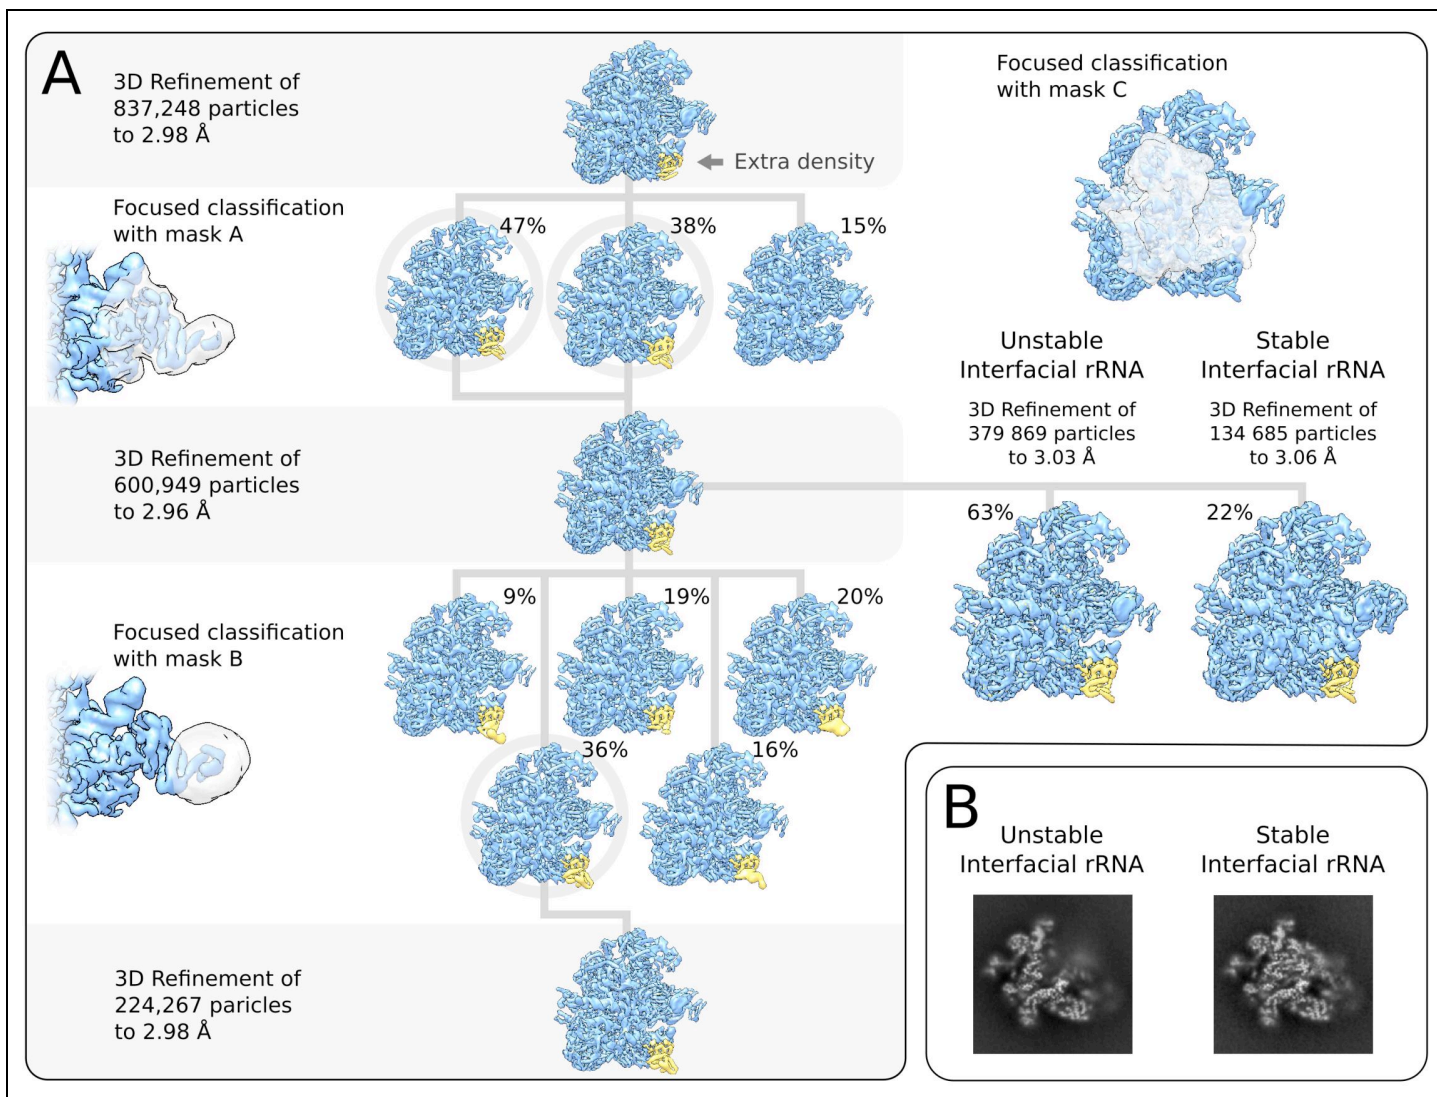

Supplementary Figure 1

### EM data processing pipeline for dataset 2.

Initial processing focused on isolating particles with extraneous density by applying a mask over the MALSU1-LOR8F8-mt-ACP module (mask A). The density for this region was further improved by applying a mask over the density for just LOR8F8-mt-ACP (mask B). The particles were separated into two subclasses based on the stability of mt-rRNA using a mask over the interfacial mt-rRNA (mask C). These classes were used for model building and interpretation. Mitochondria are viewed as in Fig. 1B, with density corresponding to the MALSU1-LOR8F8-mt-ACP module in yellow. Masks are shown in white. **(B)** Slices through the 3D projections for both assembly intermediates. Nebulous density at the intersubunit interface for the map with “unstable” interfacial mt-rRNA suggests that the mt-rRNA is present, but adopts multiple conformations.

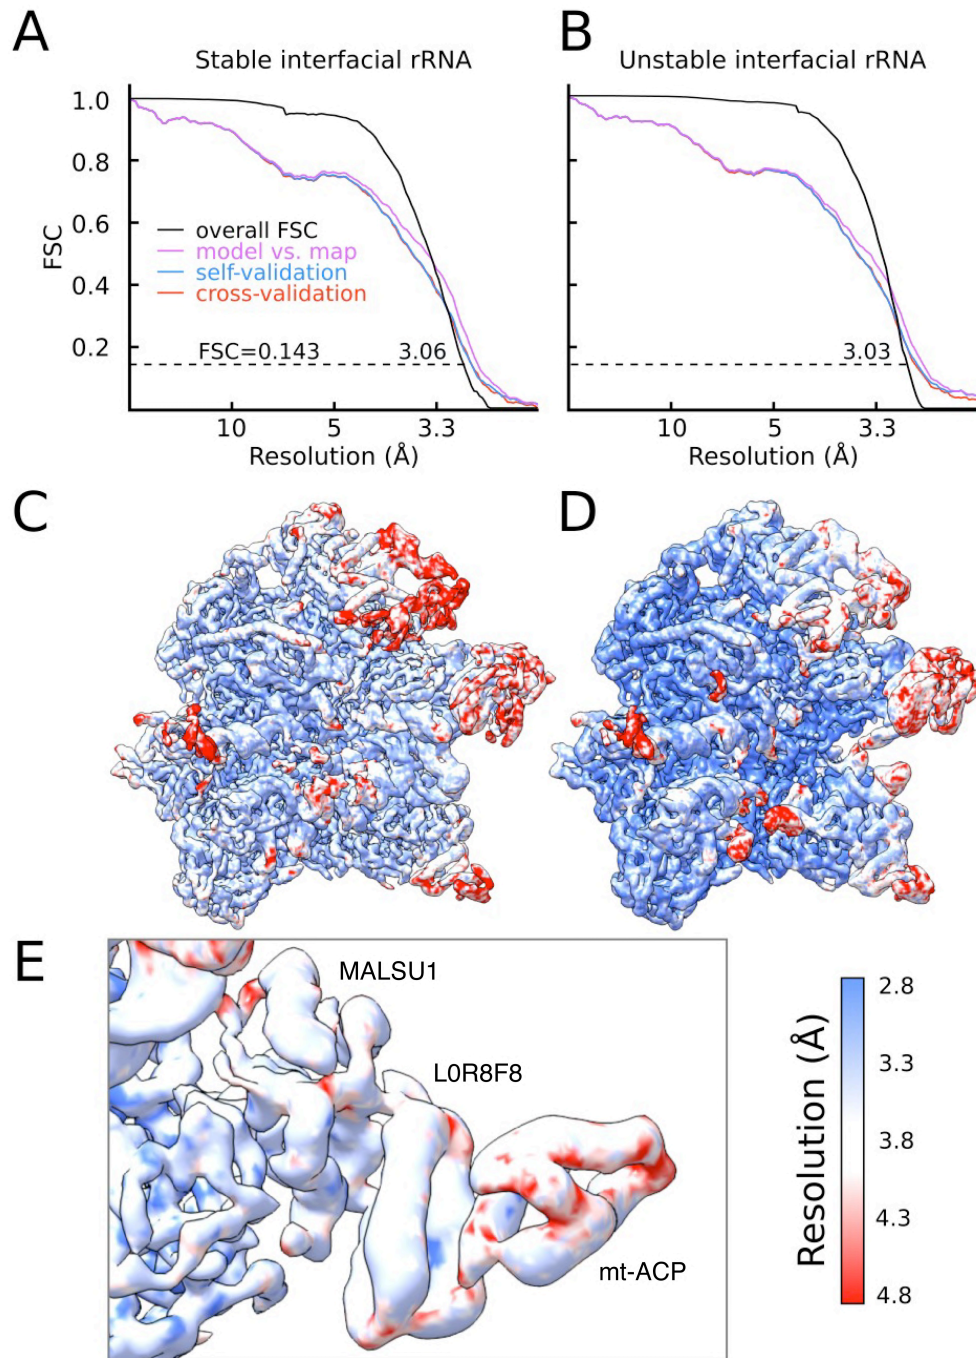

Supplementary Figure 2

**Map quality.**

(A) Fourier shell correlation (FSC) curves for the two mt-LSU assembly intermediates, with and without folded interfacial mt-rRNA. Also plotted are the FSC curves calculated between the refined model and final map, and the self and cross-validated correlations. The nominal resolution estimated from the map-to-map correlation at FSC = 0.143 is reported and agrees well with the model-to-map correlation at FSC = 0.5. (B) The cryo-EM map for each assembly intermediate colored by local resolution.

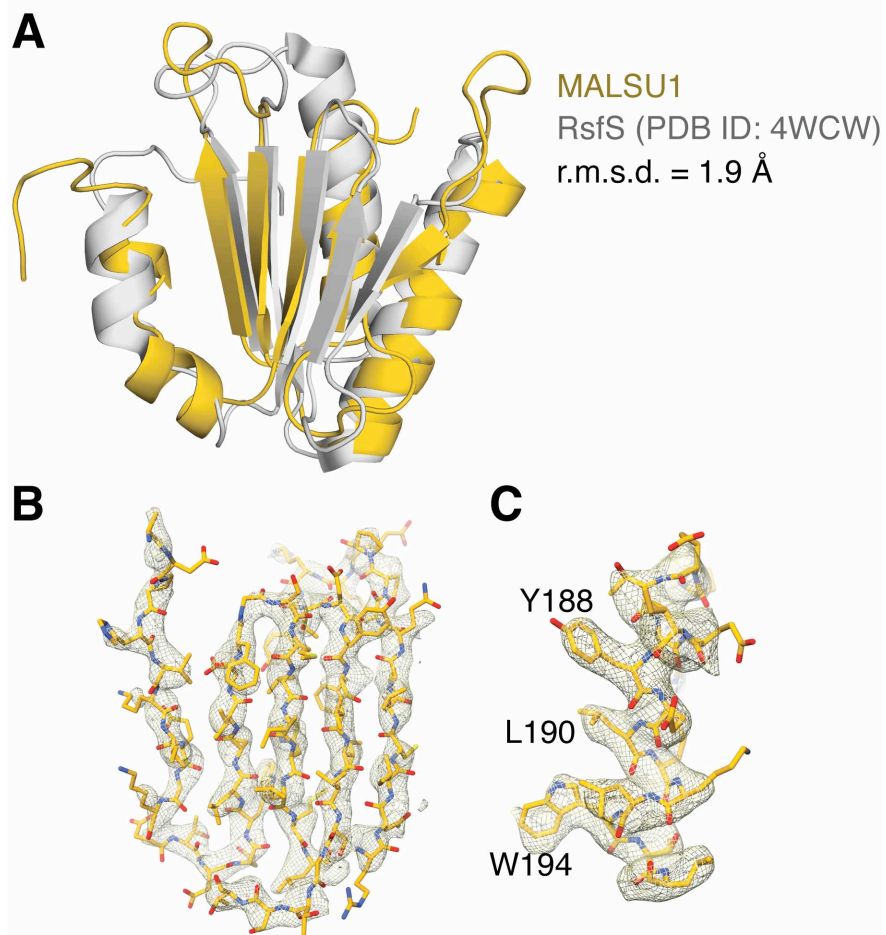

Supplementary Figure 3

### Identification of MALSU1.

(A) Superposition of MALSU1 with RsfS from *Mycobacterium tuberculosis* (PDB ID: 4WCW). (B) Fit of the model for the 5-stranded  $\beta$ -sheet of MALSU1 to the map. (C) Density and model for an  $\alpha$ -helix of MALSU1 demonstrating the quality of side-chain density.

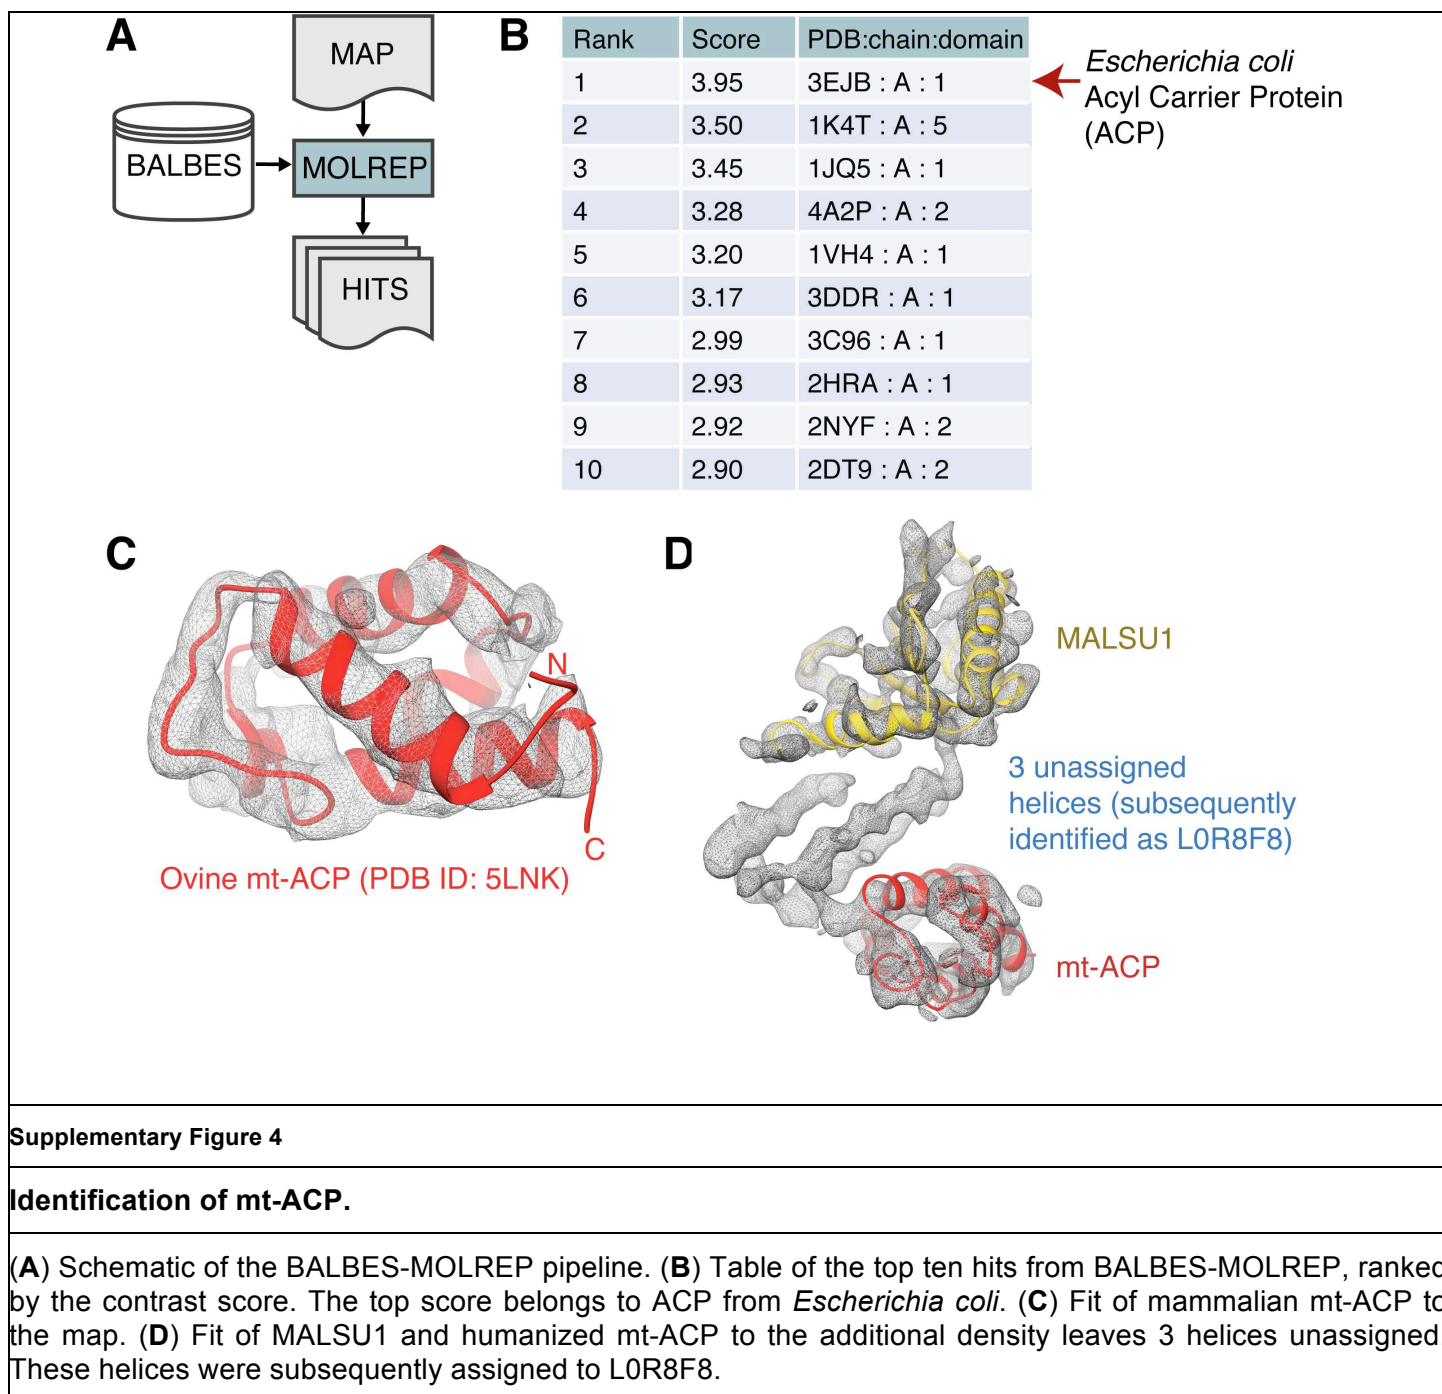

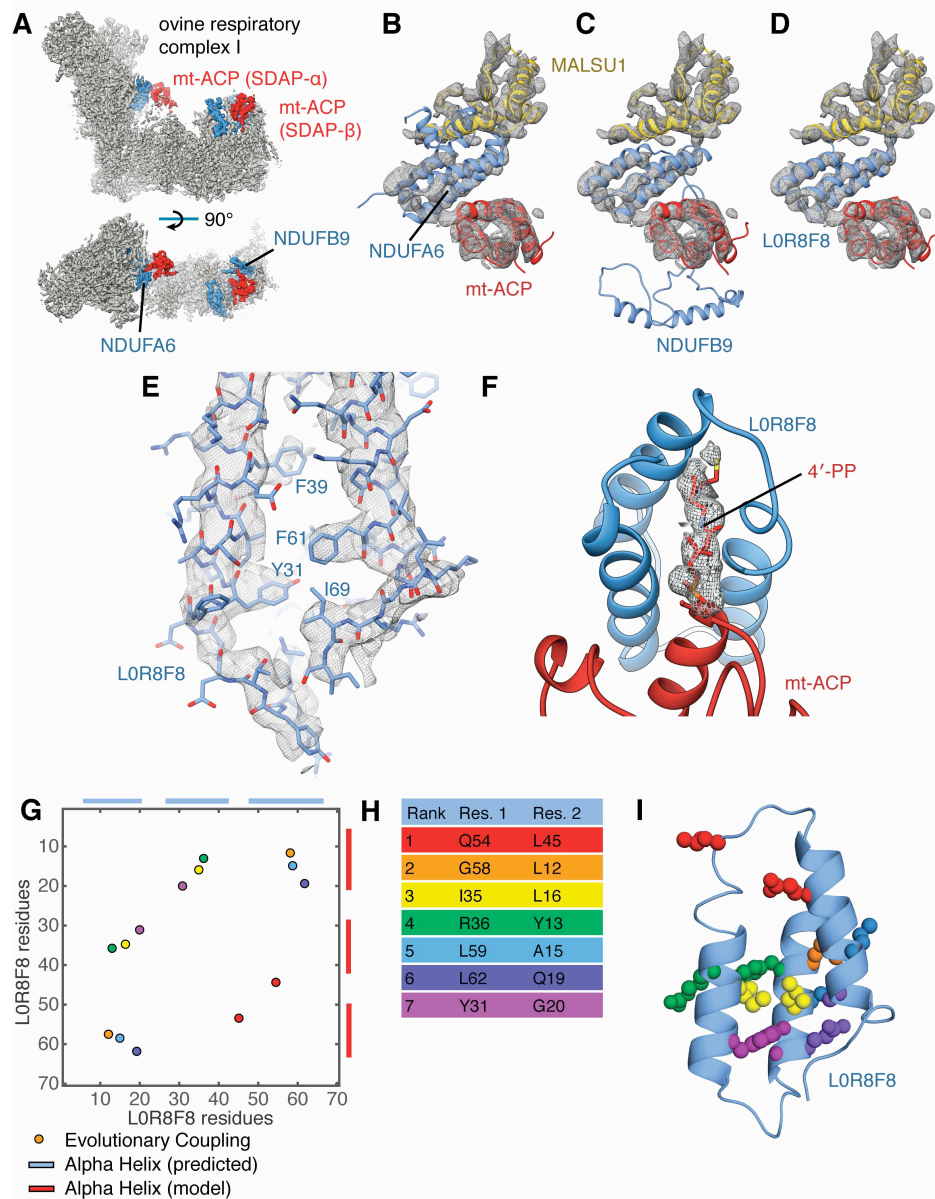

Supplementary Figure 5

### Identification of LOR8F8.

(A) There are two copies of mt-ACP in mammalian complex I (SDAP- $\alpha$  and SDAP- $\beta$ ), each of which contacts a different LYR-motif protein (NDUFA6 and NDUFB9, respectively). (B) Fit of NDUFA6 to the map. (C) Fit of NDUFB9 to the map. (D) Fit of LOR8F8 to the map. (E) Aromatic residues guided the *de novo* modeling of LOR8F8. (F) Density present in the core of LOR8F8 corresponds to the 4'-phosphopantetheine (4'-PP) modification of serine 112 of mt-ACP. (G) The top seven highest-ranking evolutionary couplings for LOR8F8 plotted as colored dots. The predicted secondary structure closely matches the secondary structure extracted from the model. (H) Table of the top seven highest-ranking evolutionary couplings colored according to G. (I) Evolutionary couplings mapped onto the structure of LOR8F8. Evolutionary coupled residues are typically in close spatial proximity, as would be expected for a correctly built fold.
